# Supplementary material for: Dissemination of High-Risk Clones Enterobacterales among Bulgarian Fecal Carriage Isolates
Source: MDPI journal article supplement (doi:10.3390/microorganisms10112144), 2022-10-29
Supplement: s1 [file s1]

Table S1. Antimicrobial susceptibility of 205 cefotaxime resistant *Enterobacterales* isolates from fecal carriage samples.

| Antimicrobial agent           | Tested isolates | S           | R+I        |
|-------------------------------|-----------------|-------------|------------|
| Amoxicillin/clavulanic acid   | 205             | 6 (7%)      | 191 (93%)  |
| Cefoxitine                    | 205             | 133 (65%)   | 72 (35%)   |
| Cefotaxime                    | 205             | 0           | 100 (100%) |
| Ceftazidime                   | 205             | 28(14%)     | 177 (86%)  |
| Cefepime                      | 205             | 5 (5%)      | 200 (95%)  |
| Imipenem                      | 205             | 191 (93%)   | 14 (7%)    |
| Meropenem                     | 205             | 191 (93%)   | 14 (7%)    |
| Gentamicin                    | 205             | 90 (44%)    | 115 (56%)  |
| Amikacin                      | 205             | 103 (50%)   | 102 (50%)  |
| Tobramycin                    | 205             | 66 (32%)    | 139 (68%)  |
| Ciprofloxacin                 | 205             | 5 (5%)      | 95 (95%)   |
| Levofloxacin                  | 205             | 68(33%)     | 137 (67%)  |
| Trimethoprim/sulfamethoxazole | 100             | 99 (48%)    | 106 (52%)  |
| Chloramphenicol*              | 100             | 159 (78%)   | 46 (22%)   |
| Tigecycline                   | 103*            | 86 (83%)    | 17 (17%)   |
| Tigecycline                   | 73**            | 5 (7%)      | 68 (93%)   |
| Fosfomycin                    | 103*            | 100 (97%)   | 3 (3%)     |
| Colistin                      | 205             | 200 (97,6%) | 5 (2,4%)   |

Abbreviations: \*, susceptibility to tigecycline and fosfomycin for 103 *E. coli* isolates was determined with disks-diffusion method; \*\*, susceptibility to tigecycline for 73 *K. pneumoniae* isolates was determined by MIC strip test

Table S2. Isoelectric focusing of representative fecal carriage isolates

| $\beta$ -lactamase                                                                                        | Positive isolates<br>according species<br>(number)                                                                                     | Number isolates,<br>tested with IEF                                     | pI of the beta-lactamases<br>with CTX hydrolytic<br>activity |
|-----------------------------------------------------------------------------------------------------------|----------------------------------------------------------------------------------------------------------------------------------------|-------------------------------------------------------------------------|--------------------------------------------------------------|
| <i>bla</i> <sub>CTX-M-15</sub> <i>n</i> =84                                                               | <i>Klebsiella</i> spp. (24)<br><i>E. coli</i> (46)<br><i>Enterobacter</i> spp. (7)<br><i>C. freundii</i> (6)<br><i>M. morganii</i> (1) | <i>n</i> =4<br><i>n</i> =9<br><i>n</i> =2<br><i>n</i> =1<br><i>n</i> =1 | 8.8                                                          |
| <i>bla</i> <sub>CTX-M-3</sub> <i>n</i> =49                                                                | <i>Klebsiella</i> spp. (30)<br><i>E. coli</i> (18)<br><i>Enterobacter</i> sp. (1)                                                      | <i>n</i> =12<br><i>n</i> =4<br><i>n</i> =1                              | 8.4                                                          |
| <i>bla</i> <sub>CTX-M-9</sub> <i>n</i> =1                                                                 | <i>E. coli</i> (1)                                                                                                                     | <i>n</i> =1                                                             | 8.1                                                          |
| <i>bla</i> <sub>CTX-M-14</sub> <i>n</i> =8                                                                | <i>E. coli</i> (7)<br><i>Klebsiella</i> sp. (1)                                                                                        | <i>n</i> =1<br><i>n</i> =1                                              | 8.1                                                          |
| <i>bla</i> <sub>CTX-M-27</sub> <i>n</i> =22                                                               | <i>E. coli</i> (22)                                                                                                                    | <i>n</i> =8                                                             | 8.2                                                          |
| <i>bla</i> <sub>NDM-1</sub> + <i>bla</i> <sub>CTX-M-15</sub> + <i>bla</i> <sub>CMY-4</sub><br><i>n</i> =9 | <i>Klebsiella</i> spp. (9)                                                                                                             | <i>n</i> =3                                                             | 8.8 and 9.2                                                  |
| <i>bla</i> <sub>NDM-1</sub> + <i>bla</i> <sub>CTX-M-3</sub> + <i>bla</i> <sub>CMY-4</sub><br><i>n</i> =1  | <i>Klebsiella</i> sp. (1)                                                                                                              | <i>n</i> =1                                                             | 8.4 and 9.2                                                  |
| <i>bla</i> <sub>KPC-2</sub> <i>n</i> =1                                                                   | <i>Klebsiella</i> sp. (1)                                                                                                              | <i>n</i> =1                                                             | 6.7                                                          |
| <i>bla</i> <sub>KPC-2</sub> + <i>bla</i> <sub>CTX-M-15</sub> <i>n</i> =1                                  | <i>Klebsiella</i> sp. (1)                                                                                                              | <i>n</i> =1                                                             | 6.7 <sup>x</sup> and 8.8                                     |
| <i>bla</i> <sub>KPC-2</sub> + <i>bla</i> <sub>CTX-M-3</sub> <i>n</i> =1                                   | <i>Klebsiella</i> sp. (1)                                                                                                              | <i>n</i> =1                                                             | 6.7 <sup>x</sup> and 8.4                                     |
| <i>bla</i> <sub>DHA-1</sub> <i>n</i> =5                                                                   | <i>E. coli</i> (5)                                                                                                                     | <i>n</i> =3                                                             | 7.8*                                                         |
| <i>bla</i> <sub>CMY-2</sub> <i>n</i> =2                                                                   | <i>E. coli</i> (2)                                                                                                                     | <i>n</i> =2                                                             | > 8.8                                                        |
| hyperproduction of SHV-1 <i>n</i> =1                                                                      | <i>Klebsiella</i> sp. (1)                                                                                                              | <i>n</i> =1                                                             | 7.6*                                                         |
| Unknown mechanism <i>n</i> =3                                                                             | <i>E. coli</i> (1)<br><i>Klebsiella</i> spp. (2)                                                                                       | <i>n</i> =1<br><i>n</i> =1                                              | 9.2<br>8.0*                                                  |
| Isolate with mixed sequence                                                                               | <i>Klebsiella</i> sp. (1)                                                                                                              | <i>n</i> =1                                                             | 8.4 and 8.8                                                  |

Abbreviations: \* didn't show cefotaxime hydrolyzing activity, x have in addition imipenem hydrolytic activity

**Figure S1** A. Isoelectric focusing and bioassay of a *K. pneumoniae* isolate (mixed sequence)

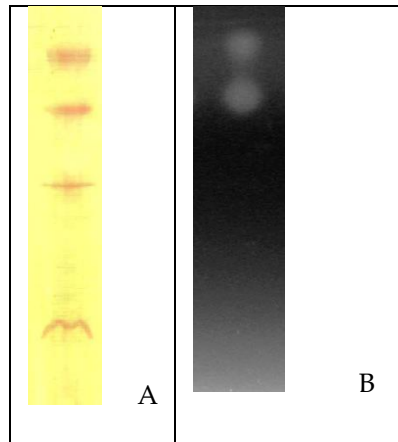

Abbreviations: A. Isoelectric focusing of a *K. pneumoniae* isolate – four beta-lactamases were visible with nitrocefin staining – with pI 5.4, with pI 7.6, pI 8.4 and pI 8.8 (pI were detected with comparison with control isolates with known enzymes); B. Bioassay - Bands with pI 8.8 and pI 8.4 had CTX hydrolytic activity

**Figure S2.** ERIC typing of *K. pneumoniae* isolates

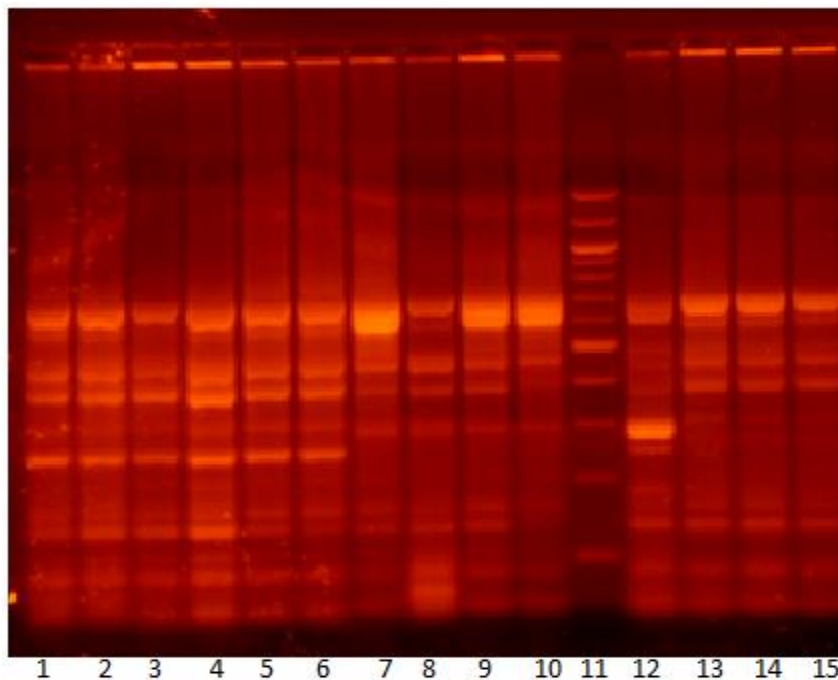

Abbreviations: Clone p - lines 1 - 6 ; clone a – lines 7, 9, 10 clone b – lines 13-16, clone h – line 8, clone c – line 12, DNA ladder - line 11

**Figure S3. ERIC typing of *E. coli* isolates**

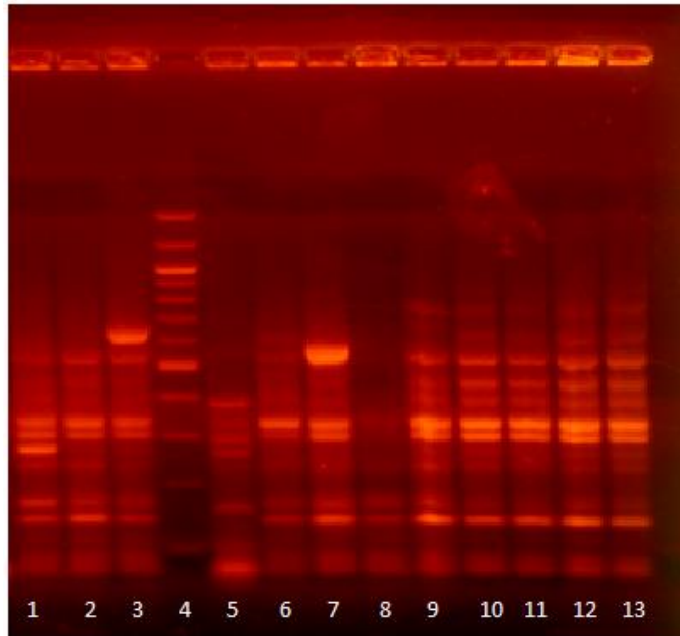

Abbreviations: clone B – line 1, Clone A – lines 2, 9 -13, clone A1– line 3; clone S – line 5, clone A2 – line 6; clone A 3 – line 7; clone A5 – line 8; line 4 – DNA ladder
